# Supplementary material for: Gene expression profiling predicts clinical outcome of prostate cancer
Source: JCI journal article supplement (doi:10.1172/jci20032), 2004-03-15
Supplement: sd1 [file 1]

## **SUPPLEMENTARY DATA**

### **Gene expression profiling predicts clinical outcome of prostate cancer**

Gennadi V. Glinsky, Anna B. Glinskii, Andrew J. Stephenson, Robert M. Hoffman,  
William L. Gerald

#### **Table of Contents**

1. Protocol of discovery and validation of the prostate cancer recurrence predictor algorithm
2. Description of the prostate cancer recurrence predictor validation data set
3. Supplementary Tables 1S to 7S

## **1. Protocol of discovery and validation of the prostate cancer recurrence predictor**

**algorithm.** We hypothesized that clinically relevant genetic signatures could be found by searching for clusters of co-regulated genes that display highly concordant transcript abundance behavior across multiple experimental models and clinical settings which are modeling or representing malignant phenotypes of interest (1-3). Thus, according to this model the primary criterion in transcript selection process should be the concordance of changes in expression rather than a magnitude of changes (e.g., fold change). One of the predictions of this model is that transcripts of interest would be expected to have a tightly controlled “rank order” of expression within a cluster of co-regulated genes reflecting a balance of up- and down-regulated mRNAs as a desired regulatory end-point in a cell. A degree of resemblance of the transcript abundance rank order within a gene cluster between a test sample and reference standard is measured by a Pearson correlation coefficient and designated as a phenotype association index (PAI). To identify genes with consistently concordant expression patterns across multiple data sets and various experimental conditions, we compared the expression profile of 218 genes (test samples) to the expression profiles of transcripts differentially regulated in multiple experimental models (reference standard) of human prostate cancer (1).

The transcripts comprising each signature were selected based on Pearson correlation coefficients ( $r > 0.95$ ) reflecting a degree of similarity of expression profiles in clinical tumor samples (recurrent versus non-recurrent tumors) and experimental samples using the following protocol.

Step 1. Sets of differentially regulated transcripts were independently identified for each experimental conditions (see below) and clinical samples using the Affymetrix microarray processing and statistical analysis software package as described in Materials and Methods.

Step 2. Sub-sets of transcripts exhibiting concordant expression changes in clinical and experimental samples were identified using the Affymetrix MicroDB and DMT software. Sub-sets of transcripts were identified with concordant changes of transcript abundance behavior in recurrent versus non-recurrent clinical tumor samples (218 transcripts) and experimental conditions independently defined for each signature (Signature 1: PC-3MLN4 orthotopic versus s.c. xenografts; Signature 2: PC-3MLN4 versus PC-3M & PC-3 orthotopic xenografts; Signature 3: PC-3/LNCap consensus class, Ref. 1). Thus, from a set of 218 transcripts three concordant sub-sets of transcripts were identified corresponding to each binary comparison of clinical and experimental samples (Table 4S, Supplement).

Step 3. Selection of small gene clusters was performed from sub-sets of genes exhibiting concordant changes of transcript abundance behavior in recurrent versus non-recurrent clinical tumor samples (218 transcripts) and experimental conditions defined for each signature (Signature 1: PC-3MLN4 orthotopic versus s.c. xenografts; Signature 2: PC-3MLN4 versus PC-3M & PC-3 orthotopic xenografts; Signature 3: PC-3/LNCap consensus class, Ref. 1). Expression profiles were presented as Log10 average fold changes for each transcript and processed for visualization and Pearson correlation analysis using Microsoft Excel software. Cut-off criterion for cluster selection for evaluation in Step 4 was set to exceed a Pearson correlation coefficient 0.95.

Step 4. Identified small gene clusters exhibiting highly concordant pattern of expression (Pearson correlation coefficient,  $r > 0.95$ ) in clinical and experimental settings were evaluated for their ability to discriminate clinical samples with distinct outcome after the therapy. To assess a potential prognostic relevance of individual gene clusters, we calculated a Pearson correlation coefficient for each of 21 tumor samples (training data set) by comparing the expression profiles of individual samples to the reference expression profiles of relevant experimental samples defined for each signature and an “average” expression profile of recurrent versus non-recurrent tumors. Fold expression changes in the “average” expression profile of recurrent versus non-recurrent tumors were calculated for each gene as a ratio of the “average” expression value of a gene in recurrent tumors (8 samples in training set) to the “average” expression value in non-recurrent tumors (13 samples in training set). Fold expression changes in individual clinical samples were calculated for each gene as a ratio of the expression value in a given sample to the “average” expression value of the gene across the entire data set of 21 samples. Based on expected correlation of expression profiles of identified gene clusters with recurrent clinical behavior of prostate cancer, we named the corresponding correlation coefficients calculated for individual samples the phenotype association indices (PAIs). We evaluated the prognostic power of identified clusters of co-regulated transcripts based on their ability to segregate the patients with recurrent and non-recurrent prostate tumors into distinct sub-groups and selected a single best performing cluster for each binary conditions specified in the Table 4S, Supplement (Figure 1; Tables 1 & 2).

Step 5. We used the Kaplan-Meier survival analysis to assess the prognostic power of each best performing cluster in predicting the probability that patients would

remain disease-free after therapy (Figure 2). We selected the prognosis discrimination cut-off value for each signature based on highest level of statistical significance in patient's stratification into poor and good prognosis groups as determined by the log-rank test (lowest P value and highest hazard ratio; Table 2 & Figure 2; Table 6S, Supplement). Clinical samples having the Pearson correlation coefficient at or higher the cut-off value were identified as having the poor prognosis signature. Clinical samples with the Pearson correlation coefficient lower the cut-off value were identified as having the good prognosis signature.

Step 6. We developed a prostate cancer recurrence predictor algorithm taking into account calls from all three individual signatures. We selected the common prognosis discrimination cut-off value for all three signatures based on highest level of statistical significance in patient's stratification into poor and good prognosis groups as determined by the Kaplan-Meier survival analysis (lowest P value and highest hazard ratio defined by the log-rank test; Table 2 & Figure 2). Clinical samples having the Pearson correlation coefficient at or higher the cut-off value defined by at least two signatures were identified as having the poor prognosis signature. Clinical samples with the Pearson correlation coefficient lower the cut-off value defined by at least two signatures were identified as having the good prognosis signature. We found that the cut-off value of PAIs  $> 0.2$  scored in two of three individual clusters allowed to achieve the 90% recurrence prediction accuracy (Table 2; Figure 2C).

Step 7. We validated the prognostic power of prostate cancer recurrence predictor algorithm alone and in combination with the established markers of outcome using an independent clinical set of 79 prostate cancer patients (Figures 3-6; Tables 3 & 4). Fold

expression changes in the “average” expression profile of recurrent versus non-recurrent tumors were calculated for each gene as a ratio of the “average” expression value of a gene in recurrent tumors (37 samples in validation set) to the “average” expression value in non-recurrent tumors (42 samples in validation set). Fold expression changes in individual clinical samples were calculated for each gene as a ratio of the expression value in a given sample to the “average” expression value of the gene across the entire data set of 79 samples.

### **References**

1. Glinsky, G.V., Krones-Herzig, A., Glinskii, A.B., Gebauer, G. 2003. Microarray analysis of xenograft-derived cancer cell lines representing multiple experimental models of human prostate cancer. *Molecular Carcinogenesis*. **37**: 209-221.
2. Glinsky, G.V., Krones-Herzig, A., Glinskii, A.B. 2003. Malignancy-associated regions of transcriptional activation: gene expression profiling identifies common chromosomal regions of a recurrent transcriptional activation in human prostate, breast, ovarian, and colon cancers. *Neoplasia*. **5**: 21-228.
3. Glinsky, G.V., Ivanova, Y.A., Glinskii, A.B. 2003. Common malignancy-associated regions of transcriptional activation (MARTA) in human prostate, breast, ovarian, and colon cancers are targets for DNA amplification. *Cancer Letters*. **201**: 67-77.

## **2. Description of the prostate cancer recurrence predictor validation data set**

Tissue samples were obtained from 79 patients (37 with recurrent and 42 with non-recurrent prostate cancer) who had undergone radical prostatectomy for clinically localized prostate cancer between 1993 and 1999 (Table S1). All patients had negative lymph nodes on final pathological evaluation and no patient received any neoadjuvant or adjuvant therapy before documented disease recurrence. Disease recurrence was defined as 3 consecutive increases in the level of PSA. All non-recurrent patients had maintained an undetectable PSA for a minimum of 5 years after radical prostatectomy.

The patients in our cohort do not represent consecutive patients with prostate cancer treated by radical prostatectomy at our institution between 1993 and 1999. Rather, we attempted to obtain tissue from an equal number of recurrent and non-recurrent patients for the purpose of analyzing gene expression differences between these two classes. As a result, the rate of positive surgical margins (63%), extracapsular extension (56%), and seminal vesicle invasion (13%) is higher than that reported in large radical prostatectomy series. Likewise, the median PSA level (7.6 ng/mL) is significantly higher than that reported in large radical prostatectomy series.

### **3. Supplementary Tables**

Table 1S. Clinical and pathological characteristics of 79 patients.

Table 2S. Human prostate carcinoma cell lines and xenografts derived from androgen-dependent (LNCap) and androgen-independent (PC3) lineages through serial orthotopic re-implantation and recovery from primary and metastatic tumors in nude mice.

Table 3S. 218 genes differentially regulated in 8 recurrent versus 13 non-recurrent human prostate tumors.

Table 4S. Prostate cancer recurrence predictor signatures and overall classification accuracy in good-prognosis and poor-prognosis sub-groups of patients defined according to whether they had a good-prognosis or a poor-prognosis signature.

Table 5S. Expression profiles of genes comprising prostate cancer recurrence predictor signatures.

Table 6S. Phenotype association indices for individual tumor samples comprising 21-sample clinical set utilized for discovery of the prostate cancer recurrence predictor algorithm.

Table 7S. Cox multivariate proportional hazard analysis.



Table 1S. Clinical and pathological characteristics of 79 patients

|                          | Number | Percent |
|--------------------------|--------|---------|
| Age (years)              |        |         |
| < 50                     | 5      | 6%      |
| 50 - 60                  | 30     | 38%     |
| > 60                     | 44     | 56%     |
| Biochemical relapse      |        |         |
| Yes                      | 37     | 47%     |
| No                       | 42     | 53%     |
| Tumor stage (1992 TNM)   |        |         |
| T1C                      | 34     | 43%     |
| T2A                      | 16     | 20%     |
| T2B                      | 20     | 25%     |
| T2C                      | 7      | 9%      |
| T3A                      | 2      | 3%      |
| RP Gleason Sum           |        |         |
| 4                        | 1      | 1%      |
| 5                        | 1      | 1%      |
| 6                        | 15     | 19%     |
| 7                        | 44     | 56%     |
| 8                        | 10     | 13%     |
| 9                        | 8      | 10%     |
| Capsular invasion        |        |         |
| None                     | 17     | 22%     |
| Focal                    | 6      | 8%      |
| Invasive                 | 18     | 23%     |
| Established              | 38     | 48%     |
| Surgical margins         |        |         |
| Negative                 | 29     | 37%     |
| Positive                 | 50     | 63%     |
| Seminal vesicle invasion |        |         |
| Negative                 | 69     | 87%     |
| Positive                 | 10     | 13%     |
| Lymph node               |        |         |
| Negative                 | 76     | 96%     |
| Positive                 | 3      | 4%      |
| Pre-RP PSA               |        |         |
| < 5.0                    | 18     | 23%     |
| 5.0 - 10.0               | 31     | 39%     |
| > 10.0                   | 30     | 38%     |

RP, radical prostatectomy; PSA, prostate specific antigen; Median follow-up = 70 months

**Table 2S.** Human prostate carcinoma cell lines and xenografts derived from androgen-dependent (LNCap) and androgen-independent (PC3) lineages through serial orthotopic re-implantation and recovery from primary and metastatic tumors in nude mice. RNA from all conditions was prepared at least twice from independent experiments to assure reproducibility.

| Cell Lines                    | Cycles of progression | Site of transplantation /recovery | Orthotopic tumorigenicity | Metastatic potential | RNA sources used  |
|-------------------------------|-----------------------|-----------------------------------|---------------------------|----------------------|-------------------|
| Normal Epithelia <sup>1</sup> | 0                     | None                              | None                      | None                 | In vitro          |
| PC3                           | 0                     | None                              | High                      | Intermediate         | In vitro, in vivo |
| PC3M                          | 1                     | Prostate/liver                    | High                      | High                 | In vitro, in vivo |
| PC3M-LN4                      | 4                     | Prostate/lymph nodes              | High                      | Very high            | In vitro, in vivo |
| PC3M-Pro4                     | 4                     | Prostate/prostate                 | High                      | Intermediate         | In vitro          |
| LNCap                         | 0                     | None                              | Intermediate              | Low                  | In vitro          |
| LNCap-LN3                     | 3                     | Prostate/lymph nodes              | High                      | High                 | In vitro          |
| LNCap-Pro5                    | 5                     | Prostate/prostate                 | High                      | Low                  | In vitro          |

<sup>1</sup>Two primary normal human prostate epithelial cell lines (normal epithelia) were obtained from Clonetics/BioWhittaker (San Diego, CA) and grown in complete prostate epithelial growth media provided by the supplier.

Table 3S. 218 genes differentially regulated in 8 recurrent versus 13 non-recurrent human prostate tumors

| Affymetrix Probe Set | P value - T-Test | T-Test_Change | P value - MW-Test | MW_Change | Direction |
|----------------------|------------------|---------------|-------------------|-----------|-----------|
| 40642_at             |                  | 0 Down        | 0.001             | Down      |           |
| 1135_at              | 0.001            | Down          | 0.007             | Down      |           |
| 39748_at             | 0.001            | Down          | 0.002             | Down      |           |
| 37343_at             | 0.001            | Down          | 0.007             | Down      |           |
| 37806_at             | 0.001            | Down          | 0.009             | Down      |           |
| 41352_at             | 0.001            | Down          | 0.004             | Down      |           |
| 31881_at             | 0.002            | Up            | 0.006             | Up        |           |
| 34413_at             | 0.002            | Down          | 0.005             | Down      |           |
| 39671_at             | 0.003            | Up            | 0.002             | Up        |           |
| 31577_at             | 0.003            | Up            | 0.004             | Up        |           |
| 33922_at             | 0.003            | Up            | 0.003             | Up        |           |
| 37828_at             | 0.003            | Up            | 0.006             | Up        |           |
| 40130_at             | 0.003            | Down          | 0.009             | Down      |           |
| 40328_at             | 0.003            | Down          | 0.002             | Down      |           |
| 160027_s_at          | 0.004            | Down          | 0.004             | Down      |           |
| 38994_at             | 0.004            | Down          | 0.011             | Down      |           |
| 1124_at              | 0.004            | Down          | 0.007             | Down      |           |
| 36234_at             | 0.004            | Down          | 0.006             | Down      |           |
| 33431_at             | 0.004            | Down          | 0.005             | Down      |           |
| 36732_at             | 0.005            | Down          | 0.005             | Down      |           |
| 33306_at             | 0.005            | Down          | 0.011             | Down      |           |
| 36634_at             | 0.005            | Down          | 0.017             | Down      |           |
| 32786_at             | 0.005            | Down          | 0.014             | Down      |           |
| 41868_at             | 0.005            | Down          | 0.002             | Down      |           |
| 37630_at             | 0.005            | Down          | 0.017             | Down      |           |
| 35703_at             | 0.006            | Down          | 0.006             | Down      |           |
| 32502_at             | 0.006            | Down          | 0.009             | Down      |           |
| 36422_s_at           | 0.006            | Down          | 0.036             | Down      |           |
| 265_s_at             | 0.006            | Down          | 0.036             | Down      |           |
| 36203_at             | 0.006            | Down          | 0.014             | Down      |           |
| 35834_at             | 0.006            | Down          | 0.014             | Down      |           |
| 38575_at             | 0.007            | Down          | 0.007             | Down      |           |
| 39510_r_at           | 0.007            | Down          | 0.03              | Down      |           |
| 773_at               | 0.007            | Down          | 0.025             | Down      |           |
| 35249_at             | 0.008            | Up            | 0.006             | Up        |           |

|             |            |            |
|-------------|------------|------------|
| 38312_at    | 0.008 Up   | 0.011 Up   |
| 38774_at    | 0.008 Up   | 0.006 Up   |
| 35320_at    | 0.008 Down | 0.005 Down |
| 32563_at    | 0.008 Down | 0.03 Down  |
| 160033_s_at | 0.008 Down | 0.006 Down |
| 39733_at    | 0.008 Down | 0.014 Down |
| 32109_at    | 0.008 Down | 0.02 Down  |
| 32855_at    | 0.008 Down | 0.02 Down  |
| 40448_at    | 0.008 Down | 0.036 Down |
| 32870_g_at  | 0.009 Up   | 0.005 Up   |
| 36160_s_at  | 0.009 Down | 0.03 Down  |
| 39253_s_at  | 0.009 Down | 0.012 Down |
| 32672_at    | 0.009 Down | 0.012 Down |
| 36711_at    | 0.009 Down | 0.006 Down |
| 41448_at    | 0.01 Up    | 0.005 Up   |
| 459_s_at    | 0.01 Down  | 0.006 Down |
| 41120_at    | 0.01 Down  | 0.009 Down |
| 31941_s_at  | 0.01 Down  | 0.014 Down |
| 34300_at    | 0.01 Down  | 0.011 Down |
| 32785_at    | 0.01 Down  | 0.033 Down |
| 770_at      | 0.011 Down | 0.03 Down  |
| 32907_at    | 0.011 Down | 0.03 Down  |
| 39631_at    | 0.011 Down | 0.017 Down |
| 1915_s_at   | 0.011 Down | 0.025 Down |
| 33461_at    | 0.012 Up   | 0.002 Up   |
| 39648_at    | 0.012 Up   | 0.017 Up   |
| 41062_at    | 0.012 Up   | 0.008 Up   |
| 40077_at    | 0.012 Down | 0.025 Down |
| 33308_at    | 0.012 Down | 0.043 Down |
| 37393_at    | 0.012 Down | 0.036 Down |
| 37854_at    | 0.013 Up   | 0.004 Up   |
| 33228_g_at  | 0.013 Down | 0.007 Down |
| 131_at      | 0.013 Down | 0.036 Down |
| 38291_at    | 0.013 Down | 0.025 Down |
| 1081_at     | 0.013 Down | 0.03 Down  |
| 984_g_at    | 0.014 Up   | 0.002 Up   |
| 33886_at    | 0.014 Down | 0.02 Down  |

|            |            |            |
|------------|------------|------------|
| 33436_at   | 0.014 Down | 0.025 Down |
| 37633_s_at | 0.014 Down | 0.017 Down |
| 35019_at   | 0.015 Up   | 0.009 Up   |
| 41670_at   | 0.015 Up   | 0.014 Up   |
| 35256_at   | 0.015 Up   | 0.009 Up   |
| 38985_at   | 0.015 Up   | 0.009 Up   |
| 33304_at   | 0.015 Down | 0.043 Down |
| 35775_at   | 0.016 Up   | 0.011 Up   |
| 35557_at   | 0.016 Up   | 0.025 Up   |
| 35653_at   | 0.016 Down | 0.014 Down |
| 752_s_at   | 0.016 Down | 0.017 Down |
| 1934_s_at  | 0.017 Up   | 0.007 Up   |
| 35689_at   | 0.017 Up   | 0.014 Up   |
| 39702_at   | 0.017 Up   | 0.014 Up   |
| 35720_at   | 0.017 Up   | 0.006 Up   |
| 33374_at   | 0.017 Down | 0.036 Down |
| 36833_at   | 0.017 Down | 0.025 Down |
| 1622_at    | 0.017 Down | 0.025 Down |
| 2094_s_at  | 0.017 Down | 0.02 Down  |
| 509_at     | 0.018 Down | 0.036 Down |
| 37136_at   | 0.018 Down | 0.043 Down |
| 1058_at    | 0.018 Down | 0.036 Down |
| 35649_at   | 0.018 Down | 0.036 Down |
| 34671_at   | 0.018 Down | 0.014 Down |
| 41536_at   | 0.018 Down | 0.043 Down |
| 35608_at   | 0.019 Up   | 0.017 Up   |
| 41411_at   | 0.019 Down | 0.025 Down |
| 39989_at   | 0.019 Down | 0.025 Down |
| 39385_at   | 0.019 Down | 0.043 Down |
| 33049_at   | 0.02 Up    | 0.002 Up   |
| 34676_at   | 0.02 Down  | 0.03 Down  |
| 31808_at   | 0.02 Down  | 0.039 Down |
| 1194_g_at  | 0.021 Up   | 0.009 Up   |
| 39610_at   | 0.021 Up   | 0.014 Up   |
| 32589_at   | 0.021 Up   | 0.011 Up   |
| 40569_at   | 0.021 Down | 0.02 Down  |
| 36127_g_at | 0.021 Down | 0.009 Down |

|            |            |            |
|------------|------------|------------|
| 41229_at   | 0.021 Down | 0.017 Down |
| 1662_r_at  | 0.021 Down | 0.043 Down |
| 41106_at   | 0.021 Down | 0.043 Down |
| 1126_s_at  | 0.021 Down | 0.043 Down |
| 287_at     | 0.021 Down | 0.025 Down |
| 38862_at   | 0.022 Up   | 0.006 Up   |
| 765_s_at   | 0.022 Up   | 0.015 Up   |
| 41343_at   | 0.022 Up   | 0.03 Up    |
| 33901_at   | 0.022 Up   | 0.03 Up    |
| 41585_at   | 0.022 Down | 0.017 Down |
| 41421_at   | 0.022 Down | 0.03 Down  |
| 33429_at   | 0.022 Down | 0.025 Down |
| 36681_at   | 0.022 Down | 0.03 Down  |
| 34732_at   | 0.022 Down | 0.017 Down |
| 40095_at   | 0.023 Up   | 0.011 Up   |
| 40674_s_at | 0.023 Up   | 0.004 Up   |
| 32305_at   | 0.023 Up   | 0.036 Up   |
| 36456_at   | 0.023 Up   | 0.03 Up    |
| 33596_at   | 0.023 Down | 0.036 Down |
| 2049_s_at  | 0.023 Down | 0.03 Down  |
| 31751_f_at | 0.024 Up   | 0.011 Up   |
| 34211_at   | 0.024 Up   | 0.017 Up   |
| 35039_at   | 0.024 Up   | 0.009 Up   |
| 37888_at   | 0.024 Down | 0.03 Down  |
| 35729_at   | 0.024 Down | 0.017 Down |
| 280_g_at   | 0.024 Down | 0.03 Down  |
| 39275_at   | 0.024 Down | 0.043 Down |
| 35698_at   | 0.025 Up   | 0.02 Up    |
| 41804_at   | 0.025 Up   | 0.02 Up    |
| 38452_at   | 0.026 Up   | 0.036 Up   |
| 38471_r_at | 0.026 Up   | 0.03 Up    |
| 2086_s_at  | 0.027 Down | 0.043 Down |
| 38383_at   | 0.027 Down | 0.025 Down |
| 1565_s_at  | 0.028 Up   | 0.017 Up   |
| 32480_at   | 0.028 Up   | 0.014 Up   |
| 37552_at   | 0.028 Up   | 0.036 Up   |
| 37906_at   | 0.028 Up   | 0.017 Up   |

|            |            |            |
|------------|------------|------------|
| 33916_at   | 0.028 Down | 0.02 Down  |
| 37026_at   | 0.028 Down | 0.036 Down |
| 40503_at   | 0.028 Down | 0.043 Down |
| 39204_at   | 0.028 Down | 0.017 Down |
| 35065_at   | 0.029 Up   | 0.036 Up   |
| 34545_at   | 0.029 Up   | 0.017 Up   |
| 39219_at   | 0.029 Up   | 0.017 Up   |
| 41183_at   | 0.029 Up   | 0.025 Up   |
| 1612_s_at  | 0.029 Down | 0.02 Down  |
| 1458_at    | 0.029 Down | 0.02 Down  |
| 35253_at   | 0.03 Up    | 0.025 Up   |
| 36860_at   | 0.03 Down  | 0.009 Down |
| 36097_at   | 0.03 Down  | 0.025 Down |
| 40935_at   | 0.031 Up   | 0.007 Up   |
| 39280_at   | 0.031 Down | 0.043 Down |
| 35009_at   | 0.032 Up   | 0.036 Up   |
| 33548_f_at | 0.033 Up   | 0.014 Up   |
| 41369_at   | 0.033 Up   | 0.017 Up   |
| 32970_f_at | 0.033 Up   | 0.02 Up    |
| 34694_at   | 0.033 Up   | 0.025 Up   |
| 1237_at    | 0.033 Down | 0.02 Down  |
| 38371_at   | 0.034 Up   | 0.025 Up   |
| 35934_at   | 0.035 Up   | 0.017 Up   |
| 31533_s_at | 0.035 Up   | 0.014 Up   |
| 31591_s_at | 0.035 Up   | 0.025 Up   |
| 31807_at   | 0.035 Up   | 0.017 Up   |
| 35968_s_at | 0.035 Down | 0.036 Down |
| 40071_at   | 0.036 Down | 0.043 Down |
| 1099_s_at  | 0.036 Down | 0.036 Down |
| 40301_at   | 0.036 Down | 0.017 Down |
| 1175_s_at  | 0.037 Up   | 0.036 Up   |
| 41105_s_at | 0.037 Up   | 0.007 Up   |
| 40715_at   | 0.037 Up   | 0.011 Up   |
| 32778_at   | 0.037 Down | 0.036 Down |
| 33760_at   | 0.037 Down | 0.043 Down |
| 39995_s_at | 0.038 Up   | 0.043 Up   |
| 41666_at   | 0.038 Down | 0.025 Down |

|            |            |            |
|------------|------------|------------|
| 38506_at   | 0.038 Down | 0.036 Down |
| 794_at     | 0.039 Up   | 0.03 Up    |
| 41313_at   | 0.039 Down | 0.043 Down |
| 658_at     | 0.04 Up    | 0.036 Up   |
| 37707_i_at | 0.04 Down  | 0.02 Down  |
| 37282_at   | 0.04 Down  | 0.043 Down |
| 35786_at   | 0.041 Down | 0.043 Down |
| 32083_at   | 0.042 Up   | 0.014 Up   |
| 33948_at   | 0.042 Up   | 0.017 Up   |
| 38322_at   | 0.042 Down | 0.03 Down  |
| 659_g_at   | 0.043 Up   | 0.025 Up   |
| 205_g_at   | 0.043 Up   | 0.02 Up    |
| 32606_at   | 0.043 Up   | 0.006 Up   |
| 31383_at   | 0.044 Up   | 0.025 Up   |
| 572_at     | 0.044 Up   | 0.036 Up   |
| 37830_at   | 0.044 Up   | 0.025 Up   |
| 33029_at   | 0.044 Up   | 0.017 Up   |
| 32638_s_at | 0.045 Up   | 0.017 Up   |
| 35050_at   | 0.045 Up   | 0.017 Up   |
| 40113_at   | 0.045 Up   | 0.017 Up   |
| 31862_at   | 0.045 Up   | 0.03 Up    |
| 213_at     | 0.045 Down | 0.043 Down |
| 1435_f_at  | 0.046 Up   | 0.03 Up    |
| 1977_s_at  | 0.046 Up   | 0.036 Up   |
| 39092_at   | 0.046 Up   | 0.043 Up   |
| 31600_s_at | 0.046 Up   | 0.025 Up   |
| 1234_at    | 0.047 Up   | 0.011 Up   |
| 34307_at   | 0.047 Down | 0.03 Down  |
| 135_g_at   | 0.048 Up   | 0.036 Up   |
| 1650_g_at  | 0.048 Down | 0.043 Down |
| 988_at     | 0.048 Down | 0.03 Down  |
| 37784_at   | 0.049 Up   | 0.036 Up   |
| 40200_at   | 0.049 Down | 0.043 Down |
| 40522_at   | 0.049 Down | 0.036 Down |
| 510_g_at   | 0.049 Down | 0.036 Down |



**Table 4S.** Prostate cancer recurrence predictor signatures and overall classification accuracy in good-prognosis and poor-prognosis sub-groups of patients defined according to whether they had a good-prognosis or a poor-prognosis signature.

| Recurrence signature | Correlation coefficient | Experimental Setting                                                         | Clinical Setting                        | Overall Classification Performance | P value (Logrank test) |
|----------------------|-------------------------|------------------------------------------------------------------------------|-----------------------------------------|------------------------------------|------------------------|
| Signature 1          | $r = 0.999$             | PC-3MLN4 Orthotopic vs. PC-3MLN4 sub-cutaneous xenografts                    | 8 recurrent vs. 13 non-recurrent tumors | 95% (20 of 21)                     | $< 0.0001$             |
| Signature 2          | $r = 0.963$             | PC-3MLN4 Orthotopic vs. PC-3M & PC-3 orthotopic xenografts                   | 8 recurrent vs. 13 non-recurrent tumors | 90% (19 of 21)                     | $< 0.0001$             |
| Signature 3          | $r = 0.996$             | 5 xenograft-derived cell lines vs. NPE in vitro (PC-3/LNCap consensus class) | 8 recurrent vs. 13 non-recurrent tumors | 86% (18 of 21)                     | 0.001                  |
| Algorithm            | NA                      | All three signatures                                                         | 8 recurrent vs. 13 non-recurrent tumors | 90% (19 of 21)                     | $< 0.0001$             |

Legend: 21 prostate cancer patients who provided tumor samples comprising a signature discovery (training) data set were classified according to whether they had a good-prognosis signature or poor-prognosis signature based on PAI values defined by either individual recurrence predictor signatures or recurrence predictor algorithm which is taking into account calls from all three signatures. Correlation coefficients reflect a degree of similarity of expression profiles in clinical setting (recurrent versus non-recurrent tumors) and experimental settings (Signature 1: PC-3MLN4 orthotopic versus PC-3MLN4 s.c. xenografts; Signature 2: PC-3MLN4 orthotopic versus PC-3M & PC-3 orthotopic xenografts; Signature 3: PC-3/LNCap consensus class, Ref. 19). The number of correct predictions in poor-prognosis and good-prognosis groups is shown as a fraction of patients with the observed clinical outcome after therapy (8 patients developed relapse and 13 patients remained disease-free). P values were calculated with use of the log-rank test and reflect the statistically significant difference in the probability that patients would remain disease-free between poor-prognosis and good-prognosis sub-groups. NPE, primary normal human prostate epithelial cells.

**Table 5S.** Expression profiles of genes comprising prostate cancer recurrence predictor signatures

|             |                                                                     |                                                      |                         |
|-------------|---------------------------------------------------------------------|------------------------------------------------------|-------------------------|
| Signature 1 | PC-3MLN4 orthotopic vs. sub-cutaneous xenografts                    | Clinical Samples, Recurrent vs. Non-recurrent tumors |                         |
| Gene Name   | Log10 Fold Expression Changes                                       | Log10 Fold Expression Changes                        | Correlation Coefficient |
| MGC5466     | 0.414589187                                                         | 0.361872                                             | 0.99867454              |
| Wnt5A       | 0.212352681                                                         | 0.217576                                             |                         |
| KIAA0476    | -0.184524427                                                        | -0.12741                                             |                         |
| ITPR1       | -0.23858992                                                         | -0.18525                                             |                         |
| TCF2        | -0.344382734                                                        | -0.29267                                             |                         |
| Signature 2 | PC-3MLN4 orthotopic vs. PC-3&PC-3M orthotopic xenografts            | Clinical Samples, Recurrent vs. Non-recurrent tumors |                         |
| Gene Name   | Log10 Fold Expression Changes                                       | Log10 Fold Expression Changes                        | Correlation Coefficient |
| MGC5466     | 0.361872                                                            | 0.187749                                             | 0.963336                |
| CHAF1A      | 0.232818                                                            | 0.090371                                             |                         |
| CDS2        | 0.172482                                                            | 0.144277                                             |                         |
| IER3        | -0.20069                                                            | -0.12422                                             |                         |
| Signature 3 | Five PC-3&LNCap xenograft-derived cell lines vs. two NPE cell lines | Clinical Samples, Recurrent vs. Non-recurrent tumors |                         |
| Gene Name   | Log10 Fold Expression Changes                                       | Log10 Fold Expression Changes                        | Correlation Coefficient |
| PPFIA3      | 1.083503                                                            | 0.153976                                             | 0.995802                |
| COPEB       | -0.6184                                                             | -0.2577                                              |                         |
| FOS         | -0.69839                                                            | -0.33464                                             |                         |
| JUNB        | -0.8278                                                             | -0.33492                                             |                         |
| ZFP36       | -1.04922                                                            | -0.38858                                             |                         |

Legend: The prostate tumor samples from 21 prostate cancer patients comprising a signature discovery (training) data set as well as xenografts and xenograft-derived cell lines were subjected to a microarray gene expression profiling analysis as described in the Materials and Methods.

Correlation coefficients reflect a degree of similarity of expression profiles in clinical setting (recurrent versus non-recurrent tumors) and experimental settings (Signature 1: PC-3MLN4 orthotopic versus PC-3MLN4 s.c. xenografts; Signature 2: PC-3MLN4 orthotopic versus PC-3M & PC-3 orthotopic xenografts; Signature 3: PC-3/LNCap consensus class, Ref. 19). The expression profile in clinical samples is presented as Log10 Fold expression changes of average gene expression value in recurrent vs. non-recurrent tumors. NPE, primary normal human prostate epithelial cells.

Table 6S. Phenotype association indices for individual tumor samples

| Sample | Signature 1  | Signature 2 | Signature 3  | Recurrence | DFI |
|--------|--------------|-------------|--------------|------------|-----|
| T59    | 0.920965328  | 0.62283823  | 0.976031988  | 1          | 26  |
| T04    | 0.891655793  | 0.78388076  | 0.890977963  | 1          | 46  |
| T26    | 0.885410025  | 0.953225    | 0.853505414  | 1          | 14  |
| T33    | 0.794543542  | 0.87417819  | 0.509509129  | 0          | 15  |
| T57    | 0.710948019  | 0.69165789  | 0.884248877  | 1          | 4   |
| T17    | 0.652516655  | 0.9204434   | 0.912978554  | 1          | 3   |
| T62    | 0.576621536  | 0.87910309  | -0.922608457 | 1          | 30  |
| T23    | 0.190439806  | 0.8562719   | 0.712833807  | 1          | 37  |
| T45    | 0.062434855  | -0.57024398 | -0.353301599 | 1          | 6   |
| T46    | -0.037847471 | -0.20100716 | -0.326285749 | 0          | 57  |
| T01    | -0.151587251 | 0.57794677  | -0.931739574 | 0          | 55  |
| T25    | -0.353643694 | -0.50177771 | -0.729354419 | 0          | 52  |
| T22    | -0.365270553 | -0.13336072 | -0.838207571 | 0          | 54  |
| T54    | -0.386411713 | -0.8240244  | -0.938184703 | 0          | 51  |
| T55    | -0.46357102  | -0.89911482 | -0.964914426 | 0          | 66  |
| T10    | -0.552811926 | -0.2570071  | -0.381668168 | 0          | 50  |
| T24    | -0.56194093  | 0.2618008   | -0.370198423 | 0          | 54  |
| T13    | -0.643420256 | -0.33145908 | 0.818307891  | 0          | 54  |
| T29    | -0.783661162 | -0.77967421 | -0.674430912 | 0          | 51  |
| T60    | -0.870481405 | -0.39606961 | -0.969165663 | 0          | 55  |
| T16    | -0.910897024 | -0.49816985 | -0.838207571 | 0          | 49  |

Algorithm: 0.2 cut-off for individual indices & 2 out of 3 positive

| Sample | Signature 1  | Recurrence | DFI |
|--------|--------------|------------|-----|
| T59    | 0.920965328  | 1          | 26  |
| T04    | 0.891655793  | 1          | 46  |
| T26    | 0.885410025  | 1          | 14  |
| T33    | 0.794543542  | 0          | 15  |
| T57    | 0.710948019  | 1          | 4   |
| T17    | 0.652516655  | 1          | 3   |
| T62    | 0.576621536  | 1          | 30  |
| T23    | 0.190439806  | 1          | 37  |
| T45    | 0.062434855  | 1          | 6   |
| T46    | -0.037847471 | 0          | 57  |
| T01    | -0.151587251 | 0          | 55  |
| T25    | -0.353643694 | 0          | 52  |
| T22    | -0.365270553 | 0          | 54  |
| T54    | -0.386411713 | 0          | 51  |
| T55    | -0.46357102  | 0          | 66  |
| T10    | -0.552811926 | 0          | 50  |
| T24    | -0.56194093  | 0          | 54  |
| T13    | -0.643420256 | 0          | 54  |
| T29    | -0.783661162 | 0          | 51  |
| T60    | -0.870481405 | 0          | 55  |
| T16    | -0.910897024 | 0          | 49  |

Signature 1: 0.0 cut-off

| Sample | Signature 2         | Recurrence | DFI |
|--------|---------------------|------------|-----|
| T26    | <b>0.953225</b>     | 1          | 14  |
| T17    | <b>0.920443397</b>  | 1          | 3   |
| T62    | <b>0.879103094</b>  | 1          | 30  |
| T33    | <b>0.874178186</b>  | 0          | 15  |
| T23    | <b>0.856271899</b>  | 1          | 37  |
| T04    | <b>0.783880759</b>  | 1          | 46  |
| T57    | <b>0.691657892</b>  | 1          | 4   |
| T59    | <b>0.622838225</b>  | 1          | 26  |
| T01    | <b>0.577946771</b>  | 0          | 55  |
| T24    | <b>0.261800797</b>  | 0          | 54  |
| T22    | <b>-0.133360715</b> | 0          | 54  |
| T46    | <b>-0.201007164</b> | 0          | 57  |
| T10    | <b>-0.257007099</b> | 0          | 50  |
| T13    | <b>-0.331459078</b> | 0          | 54  |
| T60    | <b>-0.396069611</b> | 0          | 55  |
| T16    | <b>-0.498169849</b> | 0          | 49  |
| T25    | <b>-0.501777706</b> | 0          | 52  |
| T45    | <b>-0.570243976</b> | 1          | 6   |
| T29    | <b>-0.779674211</b> | 0          | 51  |
| T54    | <b>-0.824024399</b> | 0          | 51  |
| T55    | <b>-0.899114823</b> | 0          | 66  |

Signature 2: 0.6 cut-off

| Sample | Signature 3         | Recurrence | DFI |
|--------|---------------------|------------|-----|
| T59    | <b>0.976031988</b>  | 1          | 26  |
| T17    | <b>0.912978554</b>  | 1          | 3   |
| T04    | <b>0.890977963</b>  | 1          | 46  |
| T57    | <b>0.884248877</b>  | 1          | 4   |
| T26    | <b>0.853505414</b>  | 1          | 14  |
| T13    | <b>0.818307891</b>  | 0          | 54  |
| T23    | <b>0.712833807</b>  | 1          | 37  |
| T33    | <b>0.509509129</b>  | 0          | 15  |
| T46    | <b>-0.326285749</b> | 0          | 57  |
| T45    | <b>-0.353301599</b> | 1          | 6   |
| T24    | <b>-0.370198423</b> | 0          | 54  |
| T10    | <b>-0.381668168</b> | 0          | 50  |
| T29    | <b>-0.674430912</b> | 0          | 51  |
| T25    | <b>-0.729354419</b> | 0          | 52  |
| T22    | <b>-0.838207571</b> | 0          | 54  |
| T16    | <b>-0.838207571</b> | 0          | 49  |
| T62    | <b>-0.922608457</b> | 1          | 30  |
| T01    | <b>-0.931739574</b> | 0          | 55  |
| T54    | <b>-0.938184703</b> | 0          | 51  |
| T55    | <b>-0.964914426</b> | 0          | 66  |
| T60    | <b>-0.969165663</b> | 0          | 55  |

Signature 3: 0.6 cut-off

### Table 7S. Cox Proportional Hazards Survival Regression

Reference: *Statistical Models and Methods for Lifetime Data*, by J. F. Lawless. 1982, John Wiley & Sons, New York.

Variable:

| PRE RP<br>PSA | RP GLSN<br>SUM | AGE | Algorithm |
|---------------|----------------|-----|-----------|
|---------------|----------------|-----|-----------|

1            2            3            4

Descriptive Stats...

| Variable | Avg     | SD     |
|----------|---------|--------|
| 1        | 11.2085 | 9.1544 |
| 2        | 7.0759  | 0.9382 |
| 3        | 60.6215 | 6.1450 |
| 4        | 0.4177  | 0.4932 |

Iteration History...

-2 Log Likelihood = 298.5693 (Null Model)  
-2 Log Likelihood = 265.1709  
-2 Log Likelihood = 264.8556  
-2 Log Likelihood = 264.8550  
-2 Log Likelihood = 264.8550 (Converged)

Overall Model Fit...

Chi Square= 33.7143; df=4; p= 0.0000

Coefficients, Std Errs, Signif, and Conf Intervals...

| Var | Coeff. | StdErr | p      | Lo95%   | Hi95%  |
|-----|--------|--------|--------|---------|--------|
| 1   | 0.0361 | 0.0191 | 0.0593 | -0.0014 | 0.0735 |
| 2   | 0.4297 | 0.1987 | 0.0306 | 0.0402  | 0.8191 |
| 3   | 0.0502 | 0.0301 | 0.0956 | -0.0088 | 0.1092 |
| 4   | 1.3894 | 0.3556 | 0.0001 | 0.6924  | 2.0864 |

Risk Ratios and Confidence Intervals...

| Var | Risk Ratio | Lo95%  | Hi95%  |
|-----|------------|--------|--------|
| 1   | 1.0367     | 0.9986 | 1.0763 |
| 2   | 1.5367     | 1.0410 | 2.2684 |
| 3   | 1.0515     | 0.9912 | 1.1154 |
| 4   | 4.0124     | 1.9985 | 8.0556 |
